# Deaths and Medical Visits Attributable to Environmental Pollution in the United Arab Emirates

Jacqueline MacDonald Gibson<sup>1\*</sup>, Jens Thomsen<sup>2</sup>, Frederic Launay<sup>3</sup>, Elizabeth Harder<sup>1</sup>, Nicholas DeFelice<sup>1</sup>

**1** Department of Environmental Sciences and Engineering, Gillings School of Global Public Health, University of North Carolina–Chapel Hill, Chapel Hill, North Carolina, United States of America, **2** Health Authority–Abu Dhabi, Abu Dhabi, United Arab Emirates, **3** Environment Agency–Abu Dhabi, Abu Dhabi, United Arab Emirates

## Abstract

**Background:** This study estimates the potential health gains achievable in the United Arab Emirates (UAE) with improved controls on environmental pollution. The UAE is an emerging economy in which population health risks have shifted rapidly from infectious diseases to chronic conditions observed in developed nations. The UAE government commissioned this work as part of an environmental health strategic planning project intended to address this shift in the nature of the country's disease burden.

**Methods and Findings:** We assessed the burden of disease attributable to six environmental exposure routes outdoor air, indoor air, drinking water, coastal water, occupational environments, and climate change. For every exposure route, we integrated UAE environmental monitoring and public health data in a spatially resolved Monte Carlo simulation model to estimate the annual disease burden attributable to selected pollutants. The assessment included the entire UAE population (4.5 million for the year of analysis). The study found that outdoor air pollution was the leading contributor to mortality, with 651 attributable deaths (95% confidence interval [CI] 143–1,440), or 7.3% of all deaths. Indoor air pollution and occupational exposures were the second and third leading contributors to mortality, with 153 (95% CI 85–216) and 46 attributable deaths (95% CI 26–72), respectively. The leading contributor to health-care facility visits was drinking water pollution, to which 46,600 (95% CI 15,300–61,400) health-care facility visits were attributed (about 15% of the visits for all the diseases considered in this study). Major study limitations included (1) a lack of information needed to translate health-care facility visits to quality-adjusted-life-year estimates and (2) insufficient spatial coverage of environmental data.

**Conclusions:** Based on international comparisons, the UAE's environmental disease burden is low for all factors except outdoor air pollution. From a public health perspective, reducing pollutant emissions to outdoor air should be a high priority for the UAE's environmental agencies.

**Citation:** MacDonald Gibson J, Thomsen J, Launay F, Harder E, DeFelice N (2013) Deaths and Medical Visits Attributable to Environmental Pollution in the United Arab Emirates. PLoS ONE 8(3): e57536. doi:10.1371/journal.pone.0057536

**Editor:** Hamid Reza Baradaran, Tehran University of Medical Sciences, Iran (Republic of Islamic)

**Received:** October 25, 2012; **Accepted:** January 26, 2013; **Published:** March 4, 2013

**Copyright:** © 2013 MacDonald Gibson et al. This is an open-access article distributed under the terms of the Creative Commons Attribution License, which permits unrestricted use, distribution, and reproduction in any medium, provided the original author and source are credited.

**Funding:** This work was funded by the Environment Agency–Abu Dhabi ([www.ead.ae](http://www.ead.ae)). Staff from the funding organization provided environmental data to support this research but had no other role in the study design. One staff member from the funding organization (Dr. Launay) helped to prepare this manuscript and review it for accuracy. Otherwise, the funder had no role in the decision to publish this manuscript.

**Competing Interests:** The authors have declared that no competing interests exist.

\* E-mail: [jackie.macdonald@unc.edu](mailto:jackie.macdonald@unc.edu)

## Introduction

Over the past half century, the United Arab Emirates (UAE) has developed at an unprecedented rate. Prior to the discovery of oil in 1958, the UAE (then called the Trucial States) was among the Arab world's poorest nations, with “no electrical grid, indoor plumbing, telephone system, public hospital, or modern school” [1]. Fueled by oil, the UAE has transformed over the past 50 years. Steel-and-glass metropolises tower above the once barren desert, state-of-the-art desalination plants supply fresh water, factories export locally produced goods worldwide, and once-remote airports serve as international hubs. By 2010, the UAE boasted the world's third-largest gross national income per capita: \$59,993, trailing only Liechtenstein and Qatar [2].

Overall, development has dramatically improved public health in the UAE. Life expectancy has increased from less than 45 in the 1950s to 75.9 in 2010, and infant mortality rates have plummeted

from more than 180 to fewer than 5 per 1,000 births [3]. However, as in every other nation undergoing an industrial transition, development also has created new forms of environmental pollution, leading to new health risks.

As part of an anticipatory project to confront emerging environmental risks and prevent downstream public health impacts, the Environment Agency–Abu Dhabi (EAD) commissioned a study to quantify the UAE's environmental burden of disease (EBD). The EAD is charged with protecting environmental quality in Abu Dhabi, the UAE's largest emirate (comprising 80% of the UAE's land area and 33% of its population) and source of most of the UAE's petroleum wealth [4]. The EAD collaborated with the Health Authority–Abu Dhabi (HAAD), responsible for monitoring and improving public health and regulating the health-care sector in Abu Dhabi emirate. The EAD and HAAD recruited an international research team of environmental and public health

**Table 1.** Causes of mortality considered in this study.

| Exposure route               | Cause of mortality                    | ICD-10 code(s) | Baseline mortality (deaths in 2008) | Pollutants                                                                                                | Exposure estimation method                                                                                                                                           | Relative risk (95% CI)                                                               |
|------------------------------|---------------------------------------|----------------|-------------------------------------|-----------------------------------------------------------------------------------------------------------|----------------------------------------------------------------------------------------------------------------------------------------------------------------------|--------------------------------------------------------------------------------------|
| Outdoor air pollution        | All causes (adults >30)               | N/A            | 8,865                               | PM <sub>2.5</sub> (average annual concentration, µg/m <sup>3</sup> )                                      | Abu Dhabi outdoor air quality monitors [14]                                                                                                                          | 1.06 (1.02–1.11) (per 10 µg/m <sup>3</sup> ); see [25]                               |
|                              | Respiratory disease (children <5)     | J00–99         | 27                                  | PM <sub>10</sub> (average daily concentration, µg/m <sup>3</sup> )                                        | Same as for PM <sub>2.5</sub>                                                                                                                                        | 1.017 (1.0034, 1.03) (per 10 µg/m <sup>3</sup> ); see [26]                           |
| Indoor air pollution         | Cardiovascular disease                | I00–79         | 2,310                               | Environmental tobacco smoke (ETS), present or absent in home                                              | Household surveys: ETS present in 19% of homes                                                                                                                       | Male nonsmokers: 1.25 (1.06, 1.47); female nonsmokers: 1.35 (1.11, 1.64) [27]        |
|                              | Lung cancer                           | C33–4          | 120                                 | ETS                                                                                                       | Same as previous                                                                                                                                                     | Male nonsmokers: 1.1 (0.6, 1.8); female nonsmokers: (1.2 (0.8, 1.6) [28]             |
|                              |                                       |                |                                     | Radon (average daily concentration, Bq/m <sup>3</sup> )                                                   | Household measurements* (Abu Dhabi City and Sharjah only): Abu Dhabi, lognormal (mean = 14.4, sd = 7.37); Sharjah, triangular (8, 50.3, 164); assumed zero elsewhere | 1.08 (1.13, 1.16) (per 100 Bq/m <sup>3</sup> ) [29]                                  |
|                              |                                       |                |                                     | Incense use (frequency per week)                                                                          | Household surveys: Daily users = 43.54% of population; intermittent users = 42.86%                                                                                   | Daily users: 1.8 (1.2, 2.6); intermittent users (1–5 times/week): 1.2 (0.9–1.6) [30] |
| Occupational exposures       | Asthma                                | J45            | 10                                  | Employment in occupation involving exposure to dusts, fumes                                               | UAE Ministry of Economy data on workforce participation by industry sector and occupation within sector; see [20]                                                    | Varies by occupation and gender; see [20]                                            |
|                              | Chronic obstructive pulmonary disease | J44            | 37                                  | Employment in occupation involving exposure to dusts, fumes                                               | Same as previous                                                                                                                                                     | Varies by exposure level and gender; see [20]                                        |
|                              | Asbestosis                            | 501            | 0                                   | Asbestos exposure                                                                                         | NA                                                                                                                                                                   | 100% of observed cases                                                               |
|                              | Malignant mesothelioma                | C45            | 6                                   | Asbestos exposure                                                                                         | NA                                                                                                                                                                   | 90% of observed cases in males and 25% in females; see [20]                          |
|                              | Silicosis                             | 502            | 0                                   | Silica exposure                                                                                           | NA                                                                                                                                                                   | 100% of observed cases                                                               |
|                              | Leukemia                              | C91–5          | 130                                 | Employment in occupation with exposure to diesel exhaust, benzene, ethylene oxide                         | UAE Ministry of Economy data on workforce employed by industry sector; Carcinogen Exposure (CAREX) database; see [20]                                                | Low exposure: 1.9 (1.6, 2.2); high exposure: 4 (3.6, 4.4); see [20]                  |
|                              | Lung cancer                           | C33–4          | 120                                 | Employment in occupation with exposure to arsenic, asbestos, beryllium, cadmium, chromium, nickel, silica | Same as previous                                                                                                                                                     | Low exposure: 1.21 (1.18, 1.24); high exposure: 1.77 (1.71, 1.83); see [20]          |
| Climate change               | Cardiovascular disease                | I00–79         | 2,310                               | Increase in ambient temperature attributable to global climate change                                     | 100% of population exposed                                                                                                                                           | 1.001 (1.000, 1.003) [31]                                                            |
| Drinking water contamination | Bladder cancer                        | C67, C68       | 23                                  | Drinking chlorinated water                                                                                | Citizens: 10.5% consume tap (chlorinated) water; non-citizens: tap water consumption represented as uniform (84%, 96.4%) distribution**                              | Males: 1.24 (0.97, 1.57); females: 1.17 (1.03, 1.34) [32]                            |
|                              | Colon cancer                          | C18            | 80                                  | Same as previous                                                                                          | Same as previous                                                                                                                                                     | Males: 1.09 (0.81, 1.48); females: 1.19 (0.93, 1.53) [32]                            |
|                              | Rectal cancer                         | C19–21         | 30                                  | Same as previous                                                                                          | Same as previous                                                                                                                                                     | Males: 1.24 (0.86, 1.79); females: 1.10 (0.90, 1.36) [32]                            |

Table 1. Cont.

| Exposure route | Cause of mortality | ICD-10 code(s) | Baseline mortality (deaths in 2008) | Pollutants                                                     | Exposure estimation method                                                                                                                                                                                                          | Relative risk (95% CI)                                        |
|----------------|--------------------|----------------|-------------------------------------|----------------------------------------------------------------|-------------------------------------------------------------------------------------------------------------------------------------------------------------------------------------------------------------------------------------|---------------------------------------------------------------|
|                | Gastroenteritis    | A00–9          | 7                                   | Access to regulated drinking water supply and sewage treatment | Population divided into two groups: (1) access to regulated water supply and sanitation (population fraction represented as triangular (0.96, 0.98, 1.0) distribution); (2) access to improved but unregulated water, no sanitation | Group 1: uniform (1, 4); group 2: uniform (7.2, 10.2) [21,33] |

\*EAD provided measured radon concentrations from 111 Abu Dhabi residential dwellings (202 measurements in total) and a mean, minimum, and maximum value for measurements taken in Sharjah.

\*\*Our survey of 628 citizen households found 10.5% drink tap water, 84.6% bottled water, 3.4% well water, and 1.5% water from undefined other sources [19]. Estimates using bottled water industry sales data suggest noncitizens consume 84%–96.4% of water from taps [34,35].

doi:10.1371/journal.pone.0057536.t001

specialists to carry out the analysis. This article reports on the resulting UAE EBD estimates.

The World Health Organization (WHO) in 2007 released preliminary EBD estimates for nations around the world [5]. WHO's EBD estimates included risks of four categories of environmental pollution: (1) particulate matter in outdoor air, (2) combustion of solid fuels indoors, (3) particulate matter and carcinogens in occupational environments, and (4) pathogens in water. The WHO attributed 13 million deaths each year to these risks, with the magnitude and relative importance of the risks differing considerably by epidemiologic subregion [6]. As a result of the high regional variability, a June 2007 editorial in *The Lancet* noted, "With its release of each country's profile of environmental factors and their impact on health. WHO has made a first, very important step towards facilitating more joined-up thinking by policymakers when planning interventions that have the greatest effect at a population level," but that these estimates "should only serve as a starting point for countries to collect their own data for refinement and validation" [6]. To our knowledge, the UAE is the first country to follow through on completing its own comprehensive EBD assessment, considering all the risk factors included in the WHO estimates and several others as well. As such, this project may serve as a model for similar projects in other countries.

Our research team constructed a computer simulation model, the *United Arab Emirates Environmental Burden of Disease Model*, to link data on environmental pollutant concentrations with new UAE public health data and with epidemiologic studies that estimate the relative risks of various illnesses due to pollutant exposures. To our knowledge, this model is the first to implement a comprehensive, national-scale EBD analysis in a flexible computer simulation platform that reflects uncertainty in the estimates and that can be readily updated in the future as conditions change and new local data are collected. The model is designed to support policy analyses comparing the effectiveness of alternative options for reducing environmental risks to health.

Although "environmental risk" may be defined much more broadly, for this project we focused on environmental risks that are within the mandate and capability of the EAD and HAAD to address. Specifically, we considered six categories of risk, corresponding to six different exposure routes:

1. outdoor air pollution,
2. indoor air pollution,
3. occupational exposures,

4. drinking water contamination,
5. coastal water pollution, and
6. global climate change.

This list of risk factors includes all those in the WHO preliminary estimates except for indoor air pollution due to solid fuel use, since solid fuel is no longer used for cooking in the UAE. We also included pollutants for each exposure route that were relevant to the UAE but were not considered in the previous WHO estimates (see "Pollutants," below). Since the scope of potential pollutant-exposure route combinations is in the thousands, we narrowed the list through a two-step process. First, we conducted preliminary risk assessments for candidate pollutant-exposure route combinations identified by the EAD and the WHO Centre for Environmental Health Activities for the Eastern Mediterranean Region. Then, we presented the preliminary risk assessment results at workshops involving government environment and health officials, faculty at local universities, international experts, local industries, and environmental groups. Participants were led through a systematic process, developed through previous research, to prioritize the pollutant-exposure route combinations for consideration [7]. Stakeholder engagement in the selection of risks to consider was essential because the results were intended to inform future UAE strategic planning [8].

## Methods

### Study Population

The EBD estimates include all residents of the UAE's seven emirates, including citizens and expatriates, during the year 2008 (Figure S1 and Table S1). Expatriates constituted 81% of the population—a result of workers emigrating to the UAE to fill jobs arising from the nation's ambitious development agenda, which requires more manpower than is available from the indigenous population (864,000 in 2008). About 85% of the expatriates are Asians (mostly from India and Pakistan), and another 10% are Arab [9]. The remaining 5% includes Australasians, Europeans, and North Americans.

### Health Outcomes

We provide EBD estimates for two health outcome categories: mortality and morbidity, with the latter expressed as number of health-care-facility visits. Health-care facility visits include all patient use of hospitals, doctor's offices, and pharmacies. Table 1

**Table 2.** Nonfatal illnesses considered in this study.

| Exposure route               | Illness                                     | ICD-9 code(s)     | 2008 health-care visits | Pollutants                                                                                  | Exposure estimation method                                                                                                                             | Relative risk                                                                        |
|------------------------------|---------------------------------------------|-------------------|-------------------------|---------------------------------------------------------------------------------------------|--------------------------------------------------------------------------------------------------------------------------------------------------------|--------------------------------------------------------------------------------------|
| Outdoor air pollution        | Cardiovascular disease                      | 390–448           | 307,667                 | PM <sub>10</sub> (daily average, µg/m <sup>3</sup> )                                        | Abu Dhabi outdoor air quality monitors [14]                                                                                                            | 1.003 (1.0024–1.0036) (per 10 µg/m <sup>3</sup> ); see [14]                          |
|                              | Respiratory diseases                        | 480–6; 490–7; 507 | 176,048                 | PM <sub>10</sub> (daily average, µg/m <sup>3</sup> )                                        | Same as previous                                                                                                                                       | 1.008 (1.0047–1.012) (per 10 µg/m <sup>3</sup> ); see [14]                           |
|                              |                                             |                   |                         | Ozone (daily average, ppb)                                                                  | Same as for PM <sub>10</sub>                                                                                                                           | 1.03 (1.02–1.05) (per 10 ppb); see [14]                                              |
| Indoor air pollution         | Asthma (age <18)                            | 493               | 24,418                  | Mold (presence in home)                                                                     | Household surveys: present in 16% of homes [19]                                                                                                        | 1.35 (1.20, 1.51) [36]                                                               |
|                              |                                             |                   |                         | Environmental tobacco smoke (ETS) in home                                                   | Household surveys: present in 19% of homes [19]                                                                                                        | 1.48 (1.32, 1.65) [37]                                                               |
|                              | Asthma (age ≥18)                            | 493               | 32,388                  | Mold (presence in home)                                                                     | Household surveys: present in 16% of homes [19]                                                                                                        | 1.54 (1.01, 2.32) [38]                                                               |
|                              | Asthma (age ≤6)                             | 493               | 13,879                  | Formaldehyde (daily average, µg/m <sup>3</sup> )                                            | Household surveys: lognormal (mean = 22.5, sd = 63.6) [19]                                                                                             | 1.003 (1.002, 1.004) (per 10 µg/m <sup>3</sup> ) [39]                                |
|                              | Cardiovascular disease                      | 390–448           | 307,667                 | ETS                                                                                         | Household surveys: present in 19% of homes [19]                                                                                                        | 1.25 (1.17, 1.32) [40]                                                               |
|                              | Lower respiratory tract infection (age ≤ 6) | 480–92            | 13,996                  | ETS                                                                                         | Same as previous                                                                                                                                       | 1.57 (1.28, 1.91) [41]                                                               |
|                              | Leukemia                                    | 204–208.9         | 1,520                   | ETS                                                                                         | Same as previous                                                                                                                                       | 2.28 (1.15, 4.53) [42]                                                               |
|                              | Lung cancer                                 | 162               | 444                     | Radon concentration (Bq/m <sup>3</sup> )                                                    | Data from Abu Dhabi Food Control Authority: Abu Dhabi City, lognormal (mean = 14.4, sd = 7.37); Sharjah, triangular (8, 50.3, 164); other emirates = 0 | 1.08 (1.13, 1.16) (per 100 Bq/m <sup>3</sup> ) [29]                                  |
|                              |                                             |                   |                         | Incense use (frequency)                                                                     | Household surveys: Daily users = 43.54% of population; intermittent users = 42.86% [19]                                                                | Daily users: 1.8 (1.2, 2.6); intermittent users (1–5 times/week): 1.2 (0.9–1.6) [30] |
| Occupational exposures       | Asthma                                      | 493               | 72,301                  | Employment in occupation with dusts, fumes                                                  | UAE Ministry of Economy data on workforce participation by industry sector and occupation within sector [20]                                           | Varies by occupation and gender; see [20]                                            |
|                              | Chronic obstructive pulmonary disease       | 490–2, 494, 496   | 27,212                  | Same as previous                                                                            | Same as previous                                                                                                                                       | Varies by occupation and gender; see [20]                                            |
|                              | Leukemia                                    | 204–208.9         | 1,520                   | Employment in occupation with diesel exhaust, benzene, ethylene oxide                       | UAE Ministry of Economy data on workforce employed by industry sector; Carcinogen Exposure (CAREX) database; see [20]                                  | Low exposure: 1.9 (1.6, 2.2); high exposure: 4 (3.6, 4.4) [20]                       |
|                              | Lung cancer                                 | 162               | 443                     | Employed in occupation with arsenic, asbestos, beryllium, cadmium, chromium, nickel, silica | Same as previous                                                                                                                                       | Low exposure: 1.21 (1.18, 1.24); high exposure: 1.77 (1.71, 1.83); see [20]          |
|                              | Malignant mesothelioma                      | 163               | 28                      | Diagnosed mesothelioma                                                                      | NA                                                                                                                                                     | 90% of observed cases in males; 25% of cases in females; see [20]                    |
|                              | Asbestosis                                  | 501               | 3                       | Diagnosed asbestosis                                                                        | NA                                                                                                                                                     | 100% of observed cases                                                               |
|                              | Silicosis                                   | 502               | 8                       | Diagnosed silicosis                                                                         | NA                                                                                                                                                     | 100% of observed cases                                                               |
| Climate change               | Cardiovascular disease                      | 390–448           | 307,667                 | Increase in annual average ambient temperature                                              | 100% of population exposed                                                                                                                             | 1.001 (1.000, 1.003) [31]                                                            |
| Drinking water contamination | Bladder cancer                              | 188               | 929                     | Total trihalomethane (TTHM) concentration (µg/l)                                            | 10.5% of citizens consume tap water; noncitizen consumption represented as uniform (84%, 96.4%) distribution*                                          | Males: 1.24 (0.97, 1.57); females: 1.17 (1.03, 1.34) [32]                            |
|                              | Colon cancer                                | 153               | 2,191                   | TTHM (µg/l)                                                                                 | Same as previous                                                                                                                                       | Males: 1.09 (0.81, 1.48); females: 1.19 (0.93, 1.53) [32]                            |
|                              | Rectal cancer                               | 154               | 639                     | TTHM at tap (µg/l)                                                                          | Same as previous                                                                                                                                       | Males: 1.24 (0.86, 1.79); females: 1.10 (0.90, 1.36) [32]                            |

**Table 2. Cont.**

| Exposure route          | Illness                      | ICD-9 code(s) | 2008 health-care visits | Pollutants                                                           | Exposure estimation method                                                                                                                                                                                                      | Relative risk                                                |
|-------------------------|------------------------------|---------------|-------------------------|----------------------------------------------------------------------|---------------------------------------------------------------------------------------------------------------------------------------------------------------------------------------------------------------------------------|--------------------------------------------------------------|
|                         | Gastroenteritis              | 008–9, 558.9  | 81,110                  | Availability of regulated drinking water supply and sewage treatment | Population divided into groups: (1) access to regulated water supply and sanitation (population fraction represented as triangular (0.96, 0.98, 1.0) distribution); (2) access to improved but unregulated water, no sanitation | Group 1: uniform (1, 4)<br>Group 2: uniform (7.2, 10.2) [21] |
| Coastal water pollution | Gastroenteritis <sup>4</sup> | 008–9, 558.9  | 81,110                  | Enterococci concentration in beach water (number/100 ml)             | Water quality samples from Abu Dhabi beaches <sup>**</sup> ; previous surveys of swimming frequency <sup>***</sup>                                                                                                              | 1.34 (1.00, 1.75) (per log-10) [43]                          |

\*Our survey of 628 citizen households found 10.5% drink tap water; 84.6% bottled water; 3.4% well water; and 1.5% water from undefined other sources [19]. Estimates using bottled water industry sales data suggest noncitizens consume 84%–96.4% of water from taps [34,35].

\*\*Monthly observations were available for two Abu Dhabi beaches for 2006. We therefore represented coastal water quality in each month as a uniform distribution with a lower bound equal to the lowest observed concentration and an upper bound equal to the highest observed concentration. Due to wastewater overflows in Dubai over the time period of this study, we assumed enterococci concentrations at Dubai beaches were twice those observed in Abu Dhabi (while for all other emirates, concentrations were assumed the same as in Abu Dhabi). The uniform distribution parameters for all emirates other than Dubai (in enterococci/100 ml) are as follows: Jan. (2, 8); Feb. (0, 4); Mar (0, 3); Apr (0, 0); May (0, 0); Jun (0, 12); Jul (0, 85); Aug (0, 85); Sept. (0, 43); Oct. (4, 250); Nov. (5, 6); Dec. (3, 12). For Dubai, these parameters were doubled.

\*\*\*Proportion of citizens swimming in coastal waters in any given month were estimated from Badrinath et al. [44], as follows: males ≤14: 3.8%, males >14, 1.4%; females ≤14, 0.87%; females >14, 0%. Proportion of non-citizens swimming in coastal waters were estimated from the Australian Sports Commission [45], assumed to be 6.2% (both genders, all ages).

doi:10.1371/journal.pone.0057536.t002

## UAE Environmental Burden of Disease Model

Disease burden modules  
(doubleclick to open)

High level summary results

|                                     |                                                               |                            |      |     |
|-------------------------------------|---------------------------------------------------------------|----------------------------|------|-----|
| <b>Outdoor air pollution</b>        | Outdoor air pollution summary: Total burden of disease        | (Deaths, health-care vts.) | Calc | ↙   |
| <b>Indoor air pollution</b>         | Indoor air pollution summary: Total burden of disease         | (Deaths, health-care vts.) | Calc | μ±  |
| <b>Occupational exposures</b>       | Occupational exposures summary: Total burden of disease       | (Deaths, health-care vts.) | Calc | μ   |
| <b>Drinking water contamination</b> | Drinking water contamination summary: Total burden of disease | (Deaths, health-care vts.) | Calc | mid |
| <b>Coastal water pollution</b>      | Coastal water pollution summary: Total burden of disease      | (Health-care visits)       | Calc | ⊞   |
| <b>Climate change</b>               | Climate change summary: Total burden of disease               | (Deaths, health-care vts.) | Calc | μ   |
| <b>Global variables</b>             |                                                               |                            |      |     |

**Figure 1. Top level of the UAE EBD model.** Double-clicking on any node opens further layers of a module that shows how the EBD for each exposure route is estimated. The “global variables” node contains all health outcome and population distribution data for all modules.  
doi:10.1371/journal.pone.0057536.g001

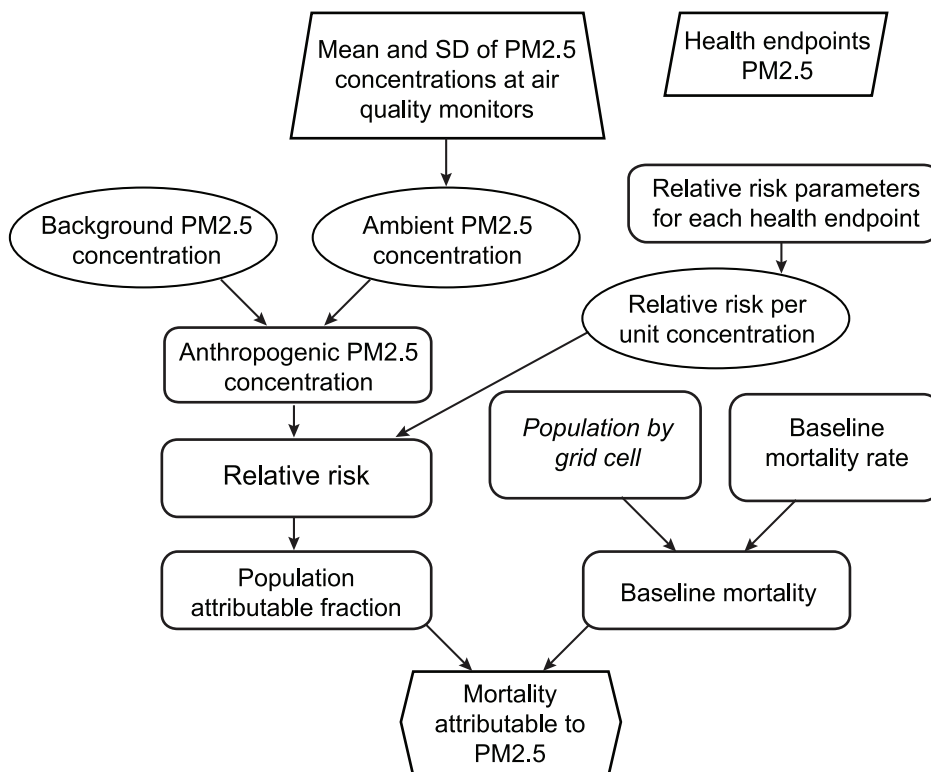

**Title:** Background PM2.5 concentration

**Description:** This variable specifies the shape of the probability density function (PDF) of the background PM2.5 concentration as uniform with lower bound 5 and upper bound 35.

**Definition:** Uniform (5, 35)

**Value:** 20

**Outputs:** Anthropogenic\_pm2... Anthropogenic PM2.5 concentration

**Source:** WHO in Ostro 2004 recommends assuming the natural background level of PM2.5 is 5 µg/m3. However, this value might be too low for the UAE, where dust storms can significantly increase natural background PM levels. Given this, the WHO-recommended level was chosen as a lower bound and 35 µg/m3 was chosen as an upper bound based on previous studies in desert regions in the United States.

**Reference:** Ostro, B. 2004. Outdoor Air Pollution: Assessing the Environmental Burden of Disease at National and Local Levels. Environmental Burden of Disease Series No. 5. Geneva: World Health Organization.

**Figure 2. Layer within the model's outdoor air pollution module and the notecard that opens when clicking on the "Background PM2.5 concentration" node.** Trapezoids indicate deterministic variables; ovals indicate random variables; rectangles with rounded corners are variables determined from equations involving higher-level nodes; and the hexagon indicates an objective node. Key nodes are as follows: *Health endpoints PM2.5*: listing of health endpoints associated with PM<sub>2.5</sub>; *Background PM2.5 concentration*: PM<sub>2.5</sub> concentration in the absence of human activity; *Mean and SD of PM2.5 concentrations at air quality monitors*: mean and SD of a year's worth of measurements at UAE air quality monitors (interpolated from monitors for each of 1,164 cells in a grid used to divide the UAE into subunits for analysis); *Relative risk parameters for each health endpoint*: as shown in Table 1, last column; *Baseline mortality rate*: mortality rate by emirate and citizenship; *Population by grid cell*: population by citizenship in each of the 1,164 geographic grid cells. doi:10.1371/journal.pone.0057536.g002

lists the causes of mortality, and Table 2 the illnesses considered in this research, along with the total numbers of each in 2008.

To support this analysis, HAAD compiled death records for Abu Dhabi emirate for 2008. The records included 2,949 deaths listed by cause (by ICD-10 code), time, location, age, gender, and nationality. This database includes all deaths reported in Abu Dhabi for the study year. HAAD considers the death notification rate to be 100%, since it is not legal to bury, cremate, or expatriate a body without a death certificate. Hence, death rates estimated from this data set should be very accurate. Comparable information was not available from other emirates. Baseline death information for the other emirates was estimated by calculating death rates for gender-citizenship groups in Abu Dhabi and then

applying those rates to population estimates for those same demographic groups in the other emirates.

HAAD also provided patient encounter records for the diseases of interest in this study from Abu Dhabi's largest health insurance provider, Daman, which covers 73% of the emirate's population. We used these data as a surrogate for morbidity estimates because they provided the most accurate and comprehensive database of incidences of illness available for this research. Prior to 2008, Abu Dhabi lacked standards for medical records coding; hence, the data set employed in this research is the first in Abu Dhabi to be compiled and quality-assured according to international best practices in medical records management [10]. The records included the date of encounter, ICD-9 code for the corresponding

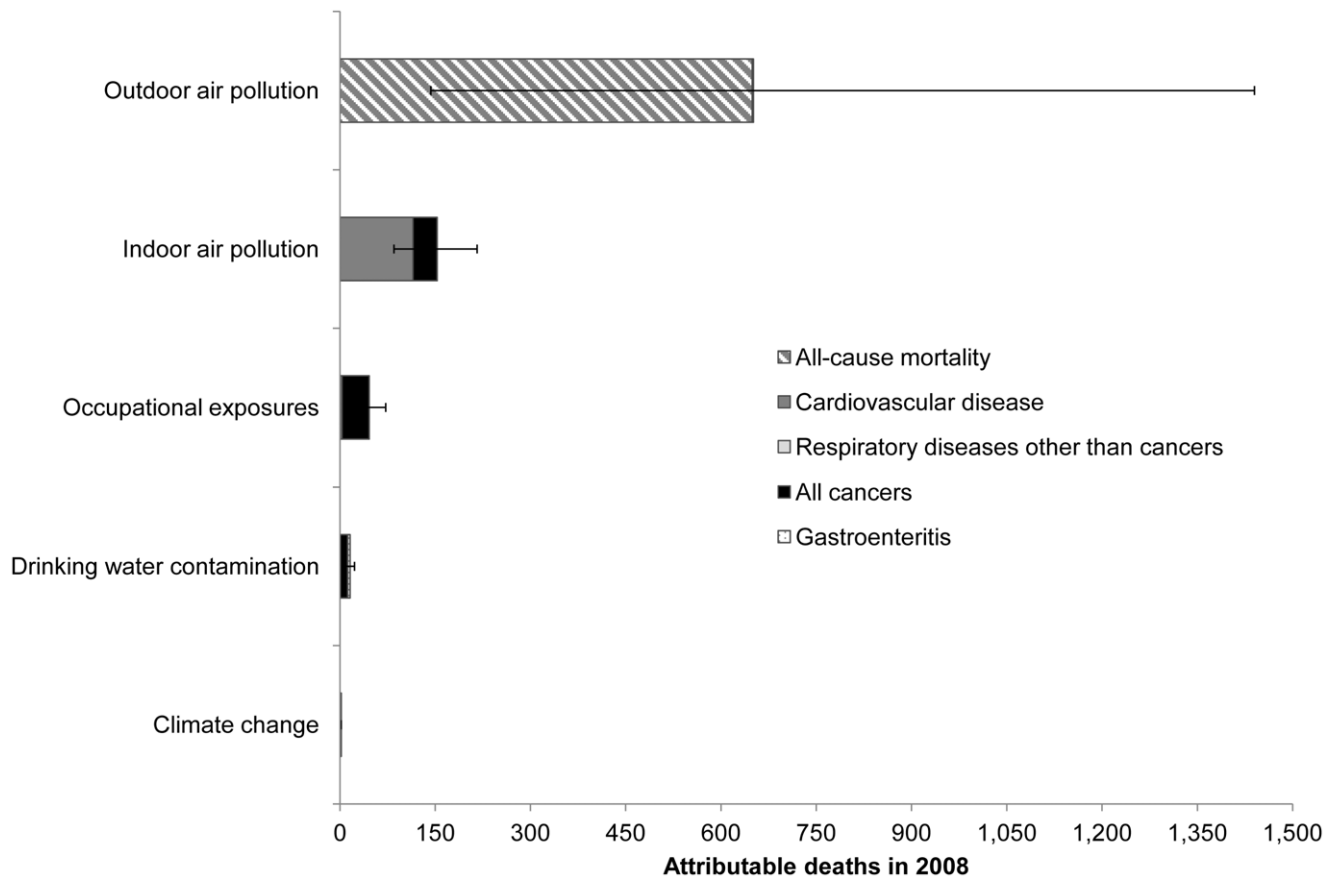

**Figure 3. Estimated deaths attributable to environmental pollutants in the UAE.** In addition to those easily seen in the chart, two deaths from respiratory diseases other than cancers were attributed to environmental pollution in 2008, both due to outdoor air pollution. doi:10.1371/journal.pone.0057536.g003

illness, health-care facility name, and patient demographic information (age, gender, citizenship). Patient identifiers were not provided. Noninfectious disease health-care facility visit records were provided for 2008 (162,228 visits recorded by Daman). Gastrointestinal illness records (10,581 in total) were provided for the first half of 2009; we assumed this represented 50% of the visits that would have occurred in 2008 among individuals covered by Daman. Like the mortality data, the health insurance claims data were scaled to cover the entire UAE population.

It is possible that using the Daman data as the basis for estimating health-care facility visit rates may have biased our results because the population insured by Daman may not be representative of the UAE population as a whole. Health insurance is mandatory in Abu Dhabi, and Daman is the major insurance provider, covering all Emiratis, all unskilled expatriate laborers, and many higher skilled expatriates. However, some highly skilled expatriates purchase enhanced insurance from one of dozens of private companies [11]. Hence, it is possible that the Daman data set under-represents skilled expatriate workers. These skilled workers may be healthier than unskilled workers due to their higher socioeconomic status. However, previous analyses have shown that skilled workers visit health-care facilities more often than unskilled workers (3.8 versus 2.7 visits per subscriber per year, respectively) [10]. Hence, the direction of the bias introduced by under-representing skilled workers is unknown, since on the one hand excluding wealthier workers would be expected to bias predicted disease rates upwards while on the other

hand wealthier workers visit doctors more often than their lower-wage counterparts, creating the potential for downward bias by excluding these workers. Nonetheless, data from the other insurance providers, which are private, were not available to support this analysis, and the HAAD data from Daman represent the most comprehensive and most effectively quality-assured health data available for our study year [10].

### Pollutants

As in previous EBD studies (see Table S2 for a listing), we focused on pollutants for which exposure is potentially common and strong epidemiologic evidence is available to predict the occurrence of illness due to contaminant exposure. As noted above, preliminary risk assessments by experts and stakeholder engagement sessions narrowed the list of candidates [7]. Tables 1 and 2 list the pollutants for each exposure route-health endpoint combination. In the case of radon, exposure data were available only for a subset of the population (residents of the city of Abu Dhabi and the emirate of Sharjah), so we report those results separately.

### EBD Estimation Method

To estimate the burden of disease due to each combination of exposure pathway and pollutant, we used the “population attributable fraction” (*PAF*) approach. The *PAF* is the proportion of reduction in disease or mortality that would be expected if exposure to a pollutant were reduced to an alternative (known as

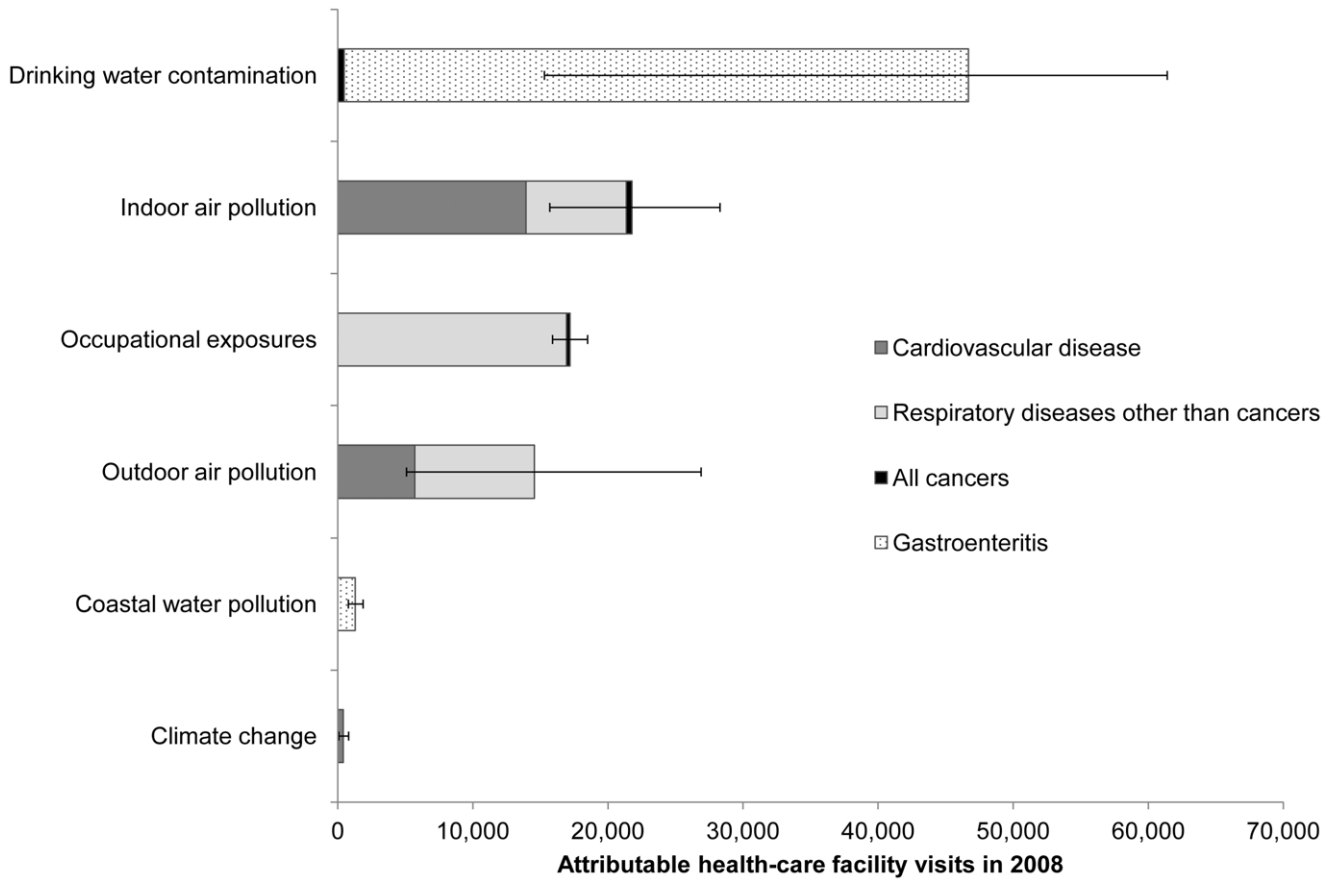

**Figure 4. Estimated health-care facility visits attributable to environmental pollutants in the UAE.**  
doi:10.1371/journal.pone.0057536.g004

“counterfactual”) level and can be computed from equation 1 [12,13].

$$PAF = \frac{\int_{x=0}^m RR(x)P(x)dx - \int_{x=0}^m RR(x)P'(x)dx}{\int_{x=0}^m RR(x)P(x)dx} \tag{1}$$

$$= \frac{\sum_{i=1}^n RR(x_i)P(x_i) - \sum_{i=1}^n RR(x_i)P'(x_i)}{\sum_{i=1}^n RR(x_i)P(x_i)}$$

where  $x$  is the exposure level;  $RR(x)$  is the relative risk at exposure level  $x$ ;  $P(x)$  is the population distribution of exposure;  $P'(x)$  is the alternative or counterfactual distribution of exposure;  $m$  is the maximum possible exposure level; and  $n$  is some finite number of discrete exposure intervals. For this study, the counterfactual exposure level was the elimination of all pollutants to background levels. Background levels were assumed equal to zero for all exposure pathways except for outdoor air, for which background concentrations were represented as uniform distributions with parameters (10, 90)  $\mu\text{g}/\text{m}^3$ , (5, 35)  $\mu\text{g}/\text{m}^3$ , and (0, 25) ppb for  $\text{PM}_{10}$ ,  $\text{PM}_{2.5}$ , and  $\text{O}_3$ , respectively, where the first parameter represents the lower bound and the second the upper bound of the distribution [14]. We estimated the EBD separately for each exposure route (i.e., we assumed all other exposure routes were unchanged while exposures via the given route were decreased). For the indoor air exposure route, mold, environmental tobacco smoke, and formaldehyde in indoor air all can exacerbate asthma in children; therefore, we estimated the total  $PAF$  for that exposure route from equation 2 [13].

$$PAF = 1 - \prod_{i=1}^3 (1 - PAF_i) \tag{2}$$

where  $PAF_i$  is the  $PAF$  for pollutant  $i$  (mold, environmental tobacco smoke, or formaldehyde). Equation 2 assumes that the exposures to the three pollutants are uncorrelated and that the pollutants act independently in triggering asthma. The first assumption is reasonable in the case of these three pollutants. For example, a smoker’s home is no more or less likely to contain radon or mold than a nonsmoker’s home. On the other hand, the second assumption (biological independence) is problematic because evidence exists that these pollutants may act synergistically. For example, previous studies suggest that children exposed to both damp indoor environments (associated with mold growth) and environmental tobacco smoke have a greatly increased risk of developing asthma compared with the risk predicted by considering each of these exposures separately [15,16]. Hence, our estimates of asthma risks associated with indoor air pollutants may be underestimates.

Combining the estimated  $PAF$  with the observed total number of cases of the health outcome ( $D_{total}$  from the fourth columns in Tables 1 and 2) gives the number of cases (deaths or health-care facility visits) attributable to the environmental exposure,  $D_{attrib}$ , as shown in Equation 3.



**Table 3.** Deaths attributable to environmental pollution risk factors in 2008.

| Exposure route               | Cause of mortality                    | Attributable fraction | Attributable deaths | Confidence interval lower bound | Confidence interval upper bound |
|------------------------------|---------------------------------------|-----------------------|---------------------|---------------------------------|---------------------------------|
| Outdoor air pollution        | All causes (adults>30)                | 7.3%                  | 649                 | 143                             | 1,438                           |
|                              | Respiratory disease (children<5)      | 7.4%                  | 2                   | 0                               | 6                               |
|                              | Total                                 |                       | 651                 | 143                             | 1,444                           |
| Indoor air pollution         | Cardiovascular disease                | 5.0%                  | 115                 | 50                              | 178                             |
|                              | Lung cancer                           | 31.7%                 | 38*                 | 14                              | 55                              |
|                              | Total                                 |                       | 153                 | 85                              | 216                             |
| Occupational exposures       | Asthma                                | 10.0%                 | 1                   | 1                               | 1                               |
|                              | Chronic obstructive pulmonary disease | 5.4%                  | 2                   | NA                              | NA                              |
|                              | Asbestosis                            | NA                    | 0                   | NA                              | NA                              |
|                              | Silicosis                             | NA                    | 0                   | NA                              | NA                              |
|                              | Malignant mesothelioma                | 100.0%                | 6                   | NA                              | NA                              |
|                              | Leukemia                              | 9.2%                  | 12                  | 5                               | 22                              |
|                              | Lung cancer                           | 20.8%                 | 25                  | 12                              | 41                              |
|                              | Total                                 |                       | 46                  | 26                              | 72                              |
| Drinking water contamination | Bladder cancer                        | 7.5%                  | 3                   | 1                               | 5                               |
|                              | Colon cancer                          | 10.0%                 | 6                   | 0                               | 12                              |
|                              | Rectal cancer                         | 57.1%                 | 3                   | 0                               | 6                               |
|                              | Gastroenteritis                       | 12.8%                 | 4                   | 1                               | 5                               |
|                              | Total                                 |                       | 15                  | 8                               | 23                              |
| Climate change               | Cardiovascular disease                | 0.1%                  | 2                   | 0                               | 2                               |

\*An additional two deaths (95% CI 1–3) may be attributable to radon exposure in Abu Dhabi city and Sharjah.

doi:10.1371/journal.pone.0057536.t003

$$D_{attrib} = PAF \times D_{total} \quad (3)$$

The relative risk columns in Tables 1 and 2 show the parameters for  $RR(x)$  in equation 1 (all based on previous international epidemiologic studies). Unless otherwise indicated, relative risks were characterized as lognormally distributed with the mean value and 95% confidence intervals drawn from the referenced studies. Relative risk estimates were selected by expert panels (Table S3) based on WHO guidance documents [17,18] and relevant epidemiologic literature.

The “exposure estimation method” columns in Tables 1 and 2 show how we estimated the population distribution of exposure ( $P(x)$  in equation 1). Previously collected pollutant concentration data from EAD’s environmental monitoring networks were available for outdoor air and coastal water, and we collected new measurements of indoor air quality [19]. However, we had to impute occupational exposures based on local employment data and previous studies in other regions for similar industrial sectors and job descriptions; details are provided elsewhere [20]. Similarly, we had to impute exposure to drinking water contaminants based on local information about sources of drinking water and access to improved water and sanitation services, using methods established in previous global EBD studies [21].

Pollutant concentrations in outdoor air can vary highly even in relatively small sub-regions. To represent this variability, we subdivided the UAE into 55 km<sup>2</sup> grid cells, each with different pollutant concentration parameters. Pollutant concentration parameters (mean and standard deviation) in each cell within the grid

were estimated from a year’s worth of outdoor air monitoring data provided by EAD. Li et al. [14] provide additional details on the monitoring network and statistical estimation techniques.

Due to the complexities of representing variability and uncertainty, previous EBD estimates generally have represented the input variables in equations 1–3 as deterministic—that is, as variables having fixed values. However, this representation can be misleading because these variables may take on any of a variety of values, causing the actual EBD experienced by a specific population to differ considerably from predictions derived only from a single fixed value for each input. For example, the concentration,  $x$ , of a contaminant to which an individual is exposed varies with time and location and also may be uncertain due to limitations in pollutant monitoring systems. Similarly, the relative risks associated with exposure  $RR(x)$  also may vary by individual and be uncertain due to limitations in the epidemiologic studies from which they were estimated.

Morgan and Henrion [22], in their classic and widely recognized guide for incorporating technical and scientific uncertainty into risk analysis, observe Policies that ignore uncertainty about technology, and about the physical world, often lead in the long run to unsatisfactory technical, social, and political outcomes. By definition, risk involves an ‘exposure to a chance of injury or loss’ (Random House, 1966). The fact that risk inherently involves chance or probability leads directly to a need to describe and deal with uncertainty).

The EBD analysis presented here follows Morgan and Henrion’s recommended protocols for incorporating variability and uncertainty into risk analysis. We represented input variables that are uncertain and/or subject to variability as random

**Table 4.** Health-care facility visits attributable to environmental pollution risk factors in 2008.

| Exposure route               | Health outcome                                      | Attributable fraction | Attributable health-care facility visits | Confidence interval lower bound | Confidence interval upper bound |
|------------------------------|-----------------------------------------------------|-----------------------|------------------------------------------|---------------------------------|---------------------------------|
| Outdoor air pollution        | Cardiovascular disease                              | 1.9%                  | 5,700                                    | 1,910                           | 10,500                          |
|                              | Respiratory disease                                 | 5.0%                  | 8,850                                    | 2,930                           | 17,300                          |
|                              | Total                                               |                       | 14,600                                   | 5,090                           | 26,900                          |
| Indoor air pollution         | Asthma (<18) (environmental tobacco smoke and mold) | 14.4%                 | 3,510*                                   | 964                             | 7,860                           |
|                              | Asthma (age≥18)                                     | 7.8%                  | 2,541                                    | 63                              | 4,730                           |
|                              | Cardiovascular disease                              | 4.5%                  | 13,940                                   | 9,620                           | 18,200                          |
|                              | Lower respiratory tract infection (age≤6)           | 9.7%                  | 1,360                                    | 710                             | 1,970                           |
|                              | Leukemia                                            | 19.0%                 | 289                                      | 44                              | 477                             |
|                              | Lung cancer                                         | 29.3%                 | 130**                                    | 38                              | 195                             |
|                              | Total                                               |                       | 21,800                                   | 15,700                          | 28,300                          |
|                              | Occupational exposures                              | Asthma                | 16.5%                                    | 11,900                          | 10,500                          |
|                              | Chronic obstructive pulmonary disease               | 18.4%                 | 5,010                                    |                                 |                                 |
|                              | Asbestosis                                          | 100.0%                | 3                                        |                                 |                                 |
|                              | Silicosis                                           | 100.0%                | 8                                        |                                 |                                 |
|                              | Malignant mesothelioma                              | 89.3%                 | 25                                       |                                 |                                 |
|                              | Leukemia                                            | 9.1%                  | 138                                      | 57                              | 255                             |
|                              | Lung cancer                                         | 25.3%                 | 112                                      | 54                              | 180                             |
|                              | Total                                               |                       | 17,200                                   | 15,900                          | 18,500                          |
| Drinking water contamination | Bladder cancer                                      | 16.6%                 | 154                                      | 10                              | 296                             |
|                              | Colon cancer                                        | 10.6%                 | 232                                      | 0                               | 569                             |
|                              | Rectal cancer                                       | 15.0%                 | 96                                       | 0                               | 219                             |
|                              | Gastroenteritis                                     | 57.0%                 | 46,200                                   | 14,700                          | 60,900                          |
|                              | Total                                               |                       | 46,600                                   | 15,300                          | 61,400                          |
| Coastal water pollution      | Gastroenteritis                                     | 1.6%                  | 1,300                                    | 792                             | 1,880                           |
| Climate change               | Cardiovascular disease                              | 0.2%                  | 410                                      | 84                              | 802                             |

\*Formaldehyde exposure adds another 74 (95% confidence interval 50–99) visits for children under age 6, not included in this total. The total here accounts for the combined risks of ETS and mold exposure and assumes those risks are independent.

\*\*An additional 20 visits (95% confidence interval 12–28) may occur due to radon exposure in Abu Dhabi city and Sharjah.

doi:10.1371/journal.pone.0057536.t004

variables (that is, as probability distributions). We then employed the Monte Carlo simulation technique to propagate the variability and uncertainty in input parameters through the calculations. In brief, equations 1–3 were computed thousands of times, each time using a new selection of input variable values drawn from the appropriate probability distributions; for a further explanation of this method, which is widely employed in risk assessment, see Morgan and Henrion [22] as well as Thomopoulos [23].

To implement the Monte Carlo simulation, we employed *Analytica* software (Lumina Decision Systems, Los Gatos, California), which was developed specifically to enable the modular construction of simulation models. Within *Analytica*, we specified appropriate probability distributions (or deterministic values where appropriate) for the input variables for each combination of contaminant and exposure pathway. We added nodes that carry out the computations represented by equations 1–3. *Analytica* then uses a method known as Latin hypercube sampling in order to compute a probability distribution for the results of equations 1–3 for each contaminant and exposure pathway based on samples drawn at random from the probability distributions for the input

variables. For these estimations, we used 1,000 iterations (i.e., 1,000 samples of each input variable), which yielded stable results. The resulting estimates indicate not only the most likely number of diseases attributable to each contaminant-exposure pathway combination but also the range of plausible values, given the uncertainty and variability in existing information.

Figure 1 shows the front page of the UAE EBD model. From within the *Analytica* program, double clicking on the name of an exposure route opens further layers, such as the layer illustrated in Figure 2. These lower layers further document the input variables and relationships among them. Figure 2 shows the bottom layer of the module for estimating the EBD due to PM<sub>2.5</sub> in outdoor air. From within *Analytica*, double clicking on any variable icon opens a display that completely specifies the variable (e.g., observational data, parameters of the underlying probability distribution). An advantage of *Analytica* is its ability to handle very large matrix operations, which enabled us to divide the UAE into geographic subunits smaller than a single emirate for purposes of analysis when sufficient exposure data were available; each geographic subunit is represented as a row of a matrix, and population,

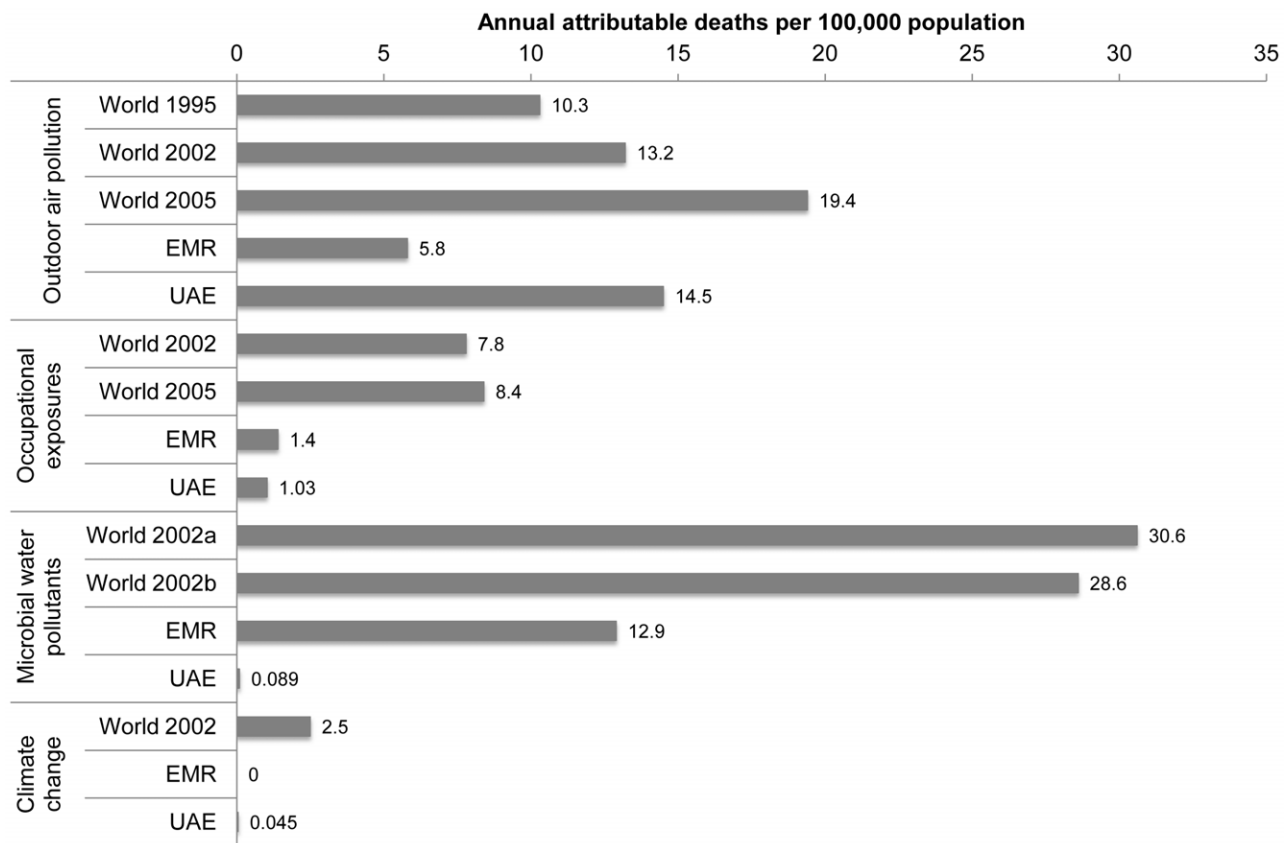

**Figure 5. Comparison of annual deaths attributed to environmental pollutants in the UAE with previous global and regional estimates.** See Table S2 for sources of international comparison estimates. doi:10.1371/journal.pone.0057536.g005

baseline disease, and exposure information are assigned accordingly. A further advantage is that the visual construction facilitates communicating the methods to nonspecialists.

## Results

Figures 3 and 4 illustrate the estimated deaths and health-care facility visits attributable to the environmental exposure routes considered in this analysis. Tables 3 and 4 provide detailed results, including the *PAF* for each exposure route–health endpoint combination.

As Figure 3 indicates, outdoor air pollution contributed to 651 deaths (95% CI 143–1,440) in 2008—more than all the other risk factors combined. Indoor air pollution and occupational exposures were the second and third leading contributors to mortality, with 153 (95% CI 85–216) and 46 deaths (95% CI 26–72) attributable to these factors, respectively.

The estimated health-care facility visits attributable to environmental pollution show a different prioritization (Figure 4). Drinking water pollution was the leading contributor, with an estimated 46,600 (95% CI 15,300–61,400) attributable visits (approximately 15% of the health-care facility visits for all the illnesses considered in this study). Indoor air pollution, occupational exposures, and outdoor air pollution contributed to similar numbers of visits (15,000–20,000 each). While these results present a somewhat different ordering than those shown for deaths in Figure 3, it is important to note that the severity of the illnesses prompting these health-care facility visits varies considerably. For example, a heart attack (to which indoor and outdoor air pollution

are important risk contributors) is much more severe than a case of mild gastroenteritis associated with drinking water contamination, especially in a wealthy nation such as the UAE, where child mortality is very low and medical assistance is readily available. Previous EBD studies have typically reported results as disability-adjusted life years (DALYs), representing the number of healthy life years lost due to living in a state of less than perfect health or dying prematurely [17], but the data necessary to translate health-care facility visits into DALYs were unavailable in this case. Future studies using DALYs as a unit of measure would account for such differences and provide a single prioritized ranking.

Figure 5 compares our estimates of the per-capita attributable deaths to previous global estimates and the WHO's estimates for the Eastern Mediterranean Region for environmental risk factors for which comparable information is available. As shown, the UAE's environmental burden of disease is low for all the factors for which relevant comparisons were available except for outdoor air pollution (see Table S2 for additional details on previous studies).

## Discussion

These results provide an initial indication of the public health benefits possible in the UAE through new interventions to reduce environmental pollution. Reducing pollutant concentrations in outdoor and indoor air and protecting workers from occupational pollutant exposures could prevent hundreds of premature deaths and tens of thousands of health-care facility visits each year. In addition, although the risk of gastrointestinal illnesses due to water pollution is very low in the UAE by global standards, additional

**Limited number of pollutants**

While capturing pollutants that are important exposure indicators for each exposure route, this analysis nonetheless neglects the vast array of other anthropogenic pollutants to which people may be exposed.

**Limited pollutant concentration data**

At the time this study was conducted, pollutant measurements were available only for outdoor air and coastal water, and even these measurements were extremely limited in number. We collected additional data on indoor air quality. Lacking were drinking water quality data as measured at consumer taps and measured occupational exposure data; hence, exposures for these routes had to be imputed from other information (see Tables 1 and 2). The estimates presented here should be updated once measured exposure data are available.

**Lack of local relative risk estimates**

Relative risks were estimated from international epidemiologic studies since such studies are lacking in the UAE. Although the studies we used are those commonly employed in international EBD studies, UAE-specific environmental epidemiologic studies would indicate whether the UAE population response to pollutants is similar to that observed elsewhere in the world.

**Extrapolation of mortality and morbidity estimates from Abu Dhabi emirate to the rest of the UAE**

We were able to obtain detailed mortality and medical records only for Abu Dhabi emirate. We extrapolated death and health-care facility visit rates to other emirates, accounting for differences in proportions of nationals and expatriates and in genders by emirate. However, if population characteristics other than nationality and gender differ substantially in other emirates from those in Abu Dhabi, then baseline death and health-care facility visit rates estimated for the other emirates could be biased. A comparison of detailed medical records for the different emirates with those of Abu Dhabi would reveal whether such biases exist, but such a comparison was not possible for the analysis presented here.

**Lack of epidemiologic evidence of synergistic effects of exposures to multiple contaminants**

While the relative risk estimates we used control for smoking, they generally do not control for the potential for exposure to multiple contaminants through multiple pathways. It is possible that contaminants may have synergistic effects, so that, for example, exposure to multiple contaminants increased susceptibility to health endpoints. The epidemiologic evidence base is not yet sufficient to consider such synergistic effects, in most cases. Further, adding such effects to the model would require information about the joint distribution of exposures to all the contaminants considered. If contaminants act in synergy, then the estimates in this analysis may be too low.

**Figure 6. Key sources of uncertainty.**

doi:10.1371/journal.pone.0057536.g006

measures to improve drinking water and coastal water quality could prevent a large fraction of mild gastrointestinal illnesses.

In many developed countries, a fear of cancer has driven programs to reduce environmental pollution [24]. It is interesting to note that environmental pollution is associated with a far larger number of deaths for noncancer health endpoints, especially cardiovascular disease, which is the leading cause of death in the UAE.

These results provide one indication of the relative impacts environmental pollutants on health in the UAE and should not be considered as exact. Indeed, the large confidence intervals (Figures 3 and 4) indicate a high level of uncertainty. Figure 6 lists important sources of uncertainty.

In addition to these uncertainties, a further limitation of the study is the inability to combine deaths and health-care facility visits into a single summary measure, such as DALYs, which would facilitate comparisons among risk factors. The information needed to calculate DALYs for the UAE population was unavailable for this study. Most importantly, calculating DALYs requires that each illness experienced by a member of the population is counted only once. However, the data available to us listed each visit to a health-care facility regardless of whether the visit was a repeat encounter for a previously diagnosed illness. To protect patient confidentiality and due to the evolving nature of

the UAE's medical record systems, we were not provided with information that would have enabled us to screen out these multiple visits. Hence, one respiratory illness case would be counted four times in the database if the same patient returned to the doctor three times after the initial visit. Hence, had we attempted to calculate DALYs, the results would have been inflated due to such repeat visits. Although it was not possible to compute DALYs, the indicators used in this research (deaths and health-care facility visits) nonetheless provide valuable information about the relative impacts of different types of environmental pollution in the UAE from a public health perspective.

Despite these limitations, this study builds on methods that the WHO has advocated over the past decade in order to support national efforts to reduce environmental risks to health [6,18]. The results yield information about opportunities to prevent illnesses and reduce health-care spending through new environmental interventions. Indeed, in part as a result of this study, Abu Dhabi is already pursuing a number of new programs to reduce environmental pollution exposures, including upgrading its outdoor air monitoring system in order to plan for air quality improvements, establishing a new occupational health management system, implementing an aggressive marine water quality monitoring program, and instituting new anti-smoking campaigns.

## Supporting Information

**Figure S1 The UAE comprises seven emirates.**  
(EPS)

**Table S1** Population distribution of the UAE by emirate and gender (2008).  
(DOCX)

**Table S2** Previous estimates of deaths attributable to environmental pollution.  
(DOCX)

**Table S3** Experts contributing to burden of disease analyses for each exposure route.  
(DOCX)

## Acknowledgments

Special thanks are due to H.E. Majid Al Mansouri, Dr. Amir Johri, and Dr. M. Z. Ali Khan for being the original champions of this project and to

## References

- Walters TN, Kadragic A, Walters LM (2006) Miracle or mirage: Is development sustainable in the United Arab Emirates? *Middle East Rev* 10: 77–91.
- United Nations Development Program (2011) Human development report. New York.
- World Bank (2001) World Databank. Available: <http://data.worldbank.org/country/unity-arab-emirates>. Accessed 2011.
- Davidson C (2005) The United Arab Emirates: A study in survival. Boulder, Colo.: Lynne Rienner Publishers.
- World Health Organization (2009) Country profiles of environmental burden of disease: United Arab Emirates. Geneva: World Health Organization. Available: [http://www.who.int/quantifying\\_ehimpacts/national/countryprofile/unity-arab-emirates.pdf](http://www.who.int/quantifying_ehimpacts/national/countryprofile/unity-arab-emirates.pdf). Accessed 31 January 2013.
- The Lancet (2007) The environment's impact on health. *Lancet* 369: 2052.
- Willis HH, MacDonald Gibson J, Shih R, Geschwind S, Olmstead S, et al. (2010) Prioritizing environmental health risks in the UAE. *Risk Anal* 30: 1842–1856.
- MacDonald Gibson J, Farah ZS (2012) Environmental risks to public health in the United Arab Emirates: A quantitative assessment and strategic plan. *Environ Health Perspect* 120: 681–686.
- Kapiszewski A (2001) Nationals and expatriates: Population and labor dilemmas of the Gulf Cooperation Council states. Reading, United Kingdom: Ithaca Press and Garnet Publishing Ltd.
- Vetter P, Boecker K (2012) Benefits of a single payment system: Case study of Abu Dhabi health system reforms. *Health Policy (Amsterdam, Netherlands)* 108: 105–114.
- Koornneef EJ, Robben PBM, Al Sciari MB, Al Siksek Z (2012) Health system reform in the emirate of Abu Dhabi, United Arab Emirates. *Health Policy (Amsterdam, Netherlands)* 108: 115–21.
- Murray CJL, Ezzati M, Lopez AD, Rodgers A, Van der Hoorn S (2003). Comparative quantification of health risks: Conceptual framework and methodological issues. *Popul Health Metr* 1: 1–20.
- Ezzati M, Van der Hoorn S, Rodgers A, Lopez AD, Mathers CD, et al. (2003) Estimates of global and regional potential health gains from reducing multiple major risk factors. *Lancet* 362: 271–280.
- Li Y, MacDonald Gibson J, Jat P, Puggioni G, Hasan M, et al. (2010) Burden of disease attributed to anthropogenic air pollution in the United Arab Emirates: Estimates based on observed air quality data. *Sci Total Environ* 408: 5784–5793.
- Andrae S, Axelson O, Bjorksten B, Fredriksson M, Kjellman NI (1988) Symptoms of bronchial hyperreactivity and asthma in relation to environmental factors. *Arch Dis Child* 63: 473–478.
- Lindfors A, Wickman M, Hedlin G, Pershagen G, Rietz H, et al. (1995) Indoor environmental risk factors in young asthmatics: A case-control study. *Arch Dis Child* 73: 408–412.
- Mathers CD, Vos T, Lopez AD, Salomon J, Ezzati M (2001) National burden of disease studies: A practical guide. Geneva: World Health Organization.
- Prüss-Ustün A, Mathers CD, Corvalan C, Woodward A (2003) Introduction and methods: Assessing the environmental burden of disease at national and local levels. Geneva: World Health Organization.
- Yeatts KB, El-Sadig M, Leith D, Kalsbeek W, Al-Maskari F, et al. (2012) Indoor air pollutants and health in the United Arab Emirates. *Environ Health Perspect* 120: 687–694.
- Folley TJ, Nylander-French LA, Joubert DM, MacDonald Gibson J (2012) Estimated burden of disease attributable to selected occupational exposures in the United Arab Emirates. *Am J Ind Med* doi:10.1002/ajim.22043.
- H.E. Razan Al Mubarak for her continued support. This report represents research and data contributions from a large number of scientists, including the following: Saravanan Arunachalam, Gregory W. Characklis, Leslie Chinery, Christopher A. Davidson, Zeinab Farah, Mohammed Zuber Farooqui, Tiina Folley, Mejs Hasan, Prahlad Jat, Leigh-Anne H. Krometis, Ying Li, Joseph N. LoBuglio, Leena A. Nylander-French, Gavino Puggioni, Marc Serre, Kenneth G. Sexton, Uma Shankar, William Vizuet, and J. Jason West. This manuscript was copy edited and prepared for publication by Angela S. Brammer, a freelance editor and layout designer.
- Fewtrell LA, Prüss-Ustün A, Bartram J, Bos R (2007) Water, sanitation and hygiene: Quantifying the health impact at national and local levels in countries with incomplete water supply and sanitation coverage. *Public Health* 15: 1–15.
- Morgan MG, Henrion M, Small M (1990) Uncertainty: A guide to dealing with uncertainty in quantitative risk and policy analysis. Cambridge, New York: Cambridge University Press.
- Thomopoulos NT (2013) Essentials of Monte Carlo simulation: Statistical methods for building simulation models. New York: Springer.
- Trumbo CW, McComas K, Kannaovakun P (2007) Cancer anxiety and the perception of risk in alarmed communities. *Risk Anal* 27: 337–350.
- Pope CA III, Burnett RT, Thun MJ, Calle EE, Krewski D, et al. (2002) Lung cancer, cardiopulmonary mortality, and long-term exposure to fine particulate air pollution. *JAMA* 287(9): 1132–1141.
- Ostro B (2004) Outdoor air pollution: Assessing the environmental burden of disease at national and local levels. Environmental Burden of Disease Series, No. 5. Geneva: World Health Organization.
- Hill SE, Blakely T, Kawachi I, Woodward A (2007) Mortality among lifelong nonsmokers exposed to secondhand smoke at home: cohort data and sensitivity analyses. *Am J Epidemiol* 165: 530–540.
- Cardenas VM, Thun MJ, Austin H, Lally CA, Clark WS, et al. (1997) Environmental tobacco smoke and lung cancer mortality in the American Cancer Society's Cancer Prevention Study. II. CCC 8: 57–64.
- Darby S, Hill D, Deo H, Auvinen A, Barros-Dios JM, et al. (2006) Residential radon and lung cancer—detailed results of a collaborative analysis of individual data on 7148 persons with lung cancer and 14,208 persons without lung cancer from 13 epidemiologic studies in Europe. *Scand J Work Environ Health* 32 Suppl 1: 1–83.
- Friborg JT, Yuan JM, Wang R, Koh WP, Lee HP, et al. (2008) Incense use and respiratory tract carcinomas: A prospective cohort study. *Cancer* 113: 1676–1684.
- McMichael AJ, Campbell-Lendrum D, Kovats S, Edwards S, Wilkinson P, et al. (2004) Global climate change. In: Ezzati M, Lopez AD, Rodgers A, Murray CJL, eds. Comparative quantification of health risks: Global and regional burden of disease attributable to selected major risk factors, vol. 1. Geneva, World Health Organization. 1543–1649.
- Morris RD, Audet AM, Angelillo IF, Chalmers TC, Mosteller F (1992) Chlorination, chlorination by-products, and cancer: A meta-analysis. *Am J Public Health* 82: 955–963.
- Prüss-Ustün A, Bos R, Gore F, Bartram J (2008) Safer water, better health: Costs, benefits and sustainability of interventions to protect and promote health. Geneva: World Health Organization.
- Wilf R (2006) Bottled water: The pure commodity in the age of branding. *J Consumer Culture* 6: 303–325.
- (2009) UAE leads bottled water industry. Food and Drink Insight. Available <http://www.foodanddrinkinsight.com/file/77640/uae-leads-bottled-water-industry.html>. Accessed 25 May 2012.
- Antova T, Pattenden S, Brunekreef B, Heinrich J, Rudnai P, et al. (2008) Exposure to indoor mould and children's respiratory health in the PATY study. *J Epidemiol Community Health* 62: 708–714.
- Vork KL, Broadwin RL, Blaisdell RJ (2007) Developing asthma in childhood from exposure to secondhand tobacco smoke: insights from a meta-regression. *Environ Health Perspect* 115: 1394–1400.
- Jaakkola MS, Nordman H, Piipari R, Uitti J, Laitinen J, et al. (2002) Indoor dampness and molds and development of adult-onset asthma: A population-based incident case-control study. *Environ Health Perspect* 110: 543–547.

39. Rumchev K, Spickett J, Bulsara M, Phillips M, Stick S (2004) Association of domestic exposure to volatile organic compounds with asthma in young children. *Thorax* 59: 746–751.
40. He J, Whelton PK (1999) Passive cigarette smoking increases risk of coronary heart disease. *Eur Heart J* 20: 1764–1765.
41. Li JS, Peat JK, Xuan W, Berry G (1999) Meta-analysis on the association between environmental tobacco smoke (ETS) exposure and the prevalence of lower respiratory tract infection in early childhood. *Pediatr Pulmonol* 27: 5–13.
42. Kasim K, Levallois P, Abdous B, Auger P, Johnson KC (2005) Environmental tobacco smoke and risk of adult leukemia. *Epidemiol* 16: 672–680.
43. Wade TJ, Calderon RL, Sams E, Beach M, Brenner KP, et al. (2006) Rapidly measured indicators of recreational water quality are predictive of swimming-associated gastrointestinal illness. *Environ Health Perspect* 114: 24–28.
44. Badrinath P, Al-Shboul QA, Zoubeidi T, Gargoum AS, El-Rufaie OE (eds.) (2002) *Measuring the health of the nation: United Arab Emirates health and lifestyle survey 2000*. Al Ain: UAE University, Faculty of Medicine and Health Sciences and College of Business and Economics.
45. Australian Sports Commission (2011) *Participation in exercise, recreation, and sport: 2010 annual report*. Sydney: Government of Australia, Standing Committee on Recreation and Sport.
